# Supplementary material for: Targeting the Mild-Hypoxia Driving Force for Metabolic and Muscle Transcriptional Reprogramming of Gilthead Sea Bream (Sparus aurata) Juveniles
Source: MDPI journal article supplement (doi:10.3390/biology10050416), 2021-05-08
Supplement: s1 [file s1]

**Table S1.** Effects of mild hypoxia conditioning and the subsequent normoxia recovery (1 or 3 weeks thereafter) on plasma and muscle tissue levels of metabolites and hormones after exercise exhaustion of gilthead sea bream juveniles. Values are the mean  $\pm$  SEM of 6-7 fish (2-3 fish per replicate tank). P-values are the result of one-way ANOVA or *t*-test analysis where appropriate. Different superscript letters or asterisks (\*) indicate significant differences between experimental groups ( $P < 0.05$ ).

|                                        | N                             | N-PF                          | M-HYP                           | P-value |
|----------------------------------------|-------------------------------|-------------------------------|---------------------------------|---------|
| <i>Sampling time: T<sub>45H</sub></i>  |                               |                               |                                 |         |
| Glucose (mg/dl)                        | 215.8 $\pm$ 12.3              | 158.9 $\pm$ 23.9              | 179.9 $\pm$ 28.1                | 0.227   |
| Lactate (mg/dl)                        | 103.7 $\pm$ 4.41 <sup>b</sup> | 53.3 $\pm$ 3.12 <sup>a</sup>  | 92.3 $\pm$ 5.06 <sup>b</sup>    | <0.001  |
| Muscular lactate (mg/g bm)             | 50.9 $\pm$ 1.93 <sup>b</sup>  | 44.9 $\pm$ 0.75 <sup>a</sup>  | 56.1 $\pm$ 1.56 <sup>b</sup>    | <0.001  |
| Triglycerides (mg/dl)                  | 2.99 $\pm$ 0.49               | 2.35 $\pm$ 0.54               | 1.82 $\pm$ 0.15                 | 0.187   |
| Free fatty acids (nmol/ $\mu$ l)       | 0.490 $\pm$ 0.06 <sup>a</sup> | 1.00 $\pm$ 0.30 <sup>ab</sup> | 1.14 $\pm$ 0.32 <sup>b</sup>    | 0.027   |
| Cortisol (ng/ml)                       | 235.0 $\pm$ 23.7 <sup>b</sup> | 88.2 $\pm$ 33.84 <sup>a</sup> | 160.3 $\pm$ 41.65 <sup>ab</sup> | 0.026   |
| Growth hormone (ng/ml)                 | 16.2 $\pm$ 7.13               | 9.36 $\pm$ 4.15               | 9.02 $\pm$ 2.28                 | 0.529   |
| Insulin-like growth factor-I (ng/ml)   | 77.3 $\pm$ 5.65 <sup>b</sup>  | 58.6 $\pm$ 4.25 <sup>a</sup>  | 61.5 $\pm$ 4.76 <sup>a</sup>    | 0.035   |
| <i>Sampling time: T<sub>+7N</sub></i>  |                               |                               |                                 |         |
| Glucose (mg/dl)                        | 225.6 $\pm$ 10.2              |                               | 168.6 $\pm$ 17.4*               | 0.018   |
| Lactate (mg/dl)                        | 104.1 $\pm$ 6.57              |                               | 124.1 $\pm$ 2.64*               | 0.017   |
| Muscular lactate (mg/g bm)             | 50.6 $\pm$ 1.86               |                               | 59.3 $\pm$ 3.13*                | 0.039   |
| Triglycerides (mg/dl)                  | 2.51 $\pm$ 0.55               |                               | 1.88 $\pm$ 0.24                 | 0.323   |
| Free fatty acids (nmol/ $\mu$ l)       | 0.423 $\pm$ 0.031             |                               | 0.789 $\pm$ 0.301               | 0.253   |
| Cortisol (ng/ml)                       | 293.5 $\pm$ 41.2              |                               | 165.3 $\pm$ 46.6                | 0.066   |
| Growth hormone (ng/ml)                 | 21.8 $\pm$ 3.51               |                               | 10.5 $\pm$ 2.84*                | 0.031   |
| Insulin-like growth factor-I (ng/ml)   | 77.9 $\pm$ 4.70               |                               | 65.7 $\pm$ 7.09                 | 0.102   |
| <i>Sampling time: T<sub>+21N</sub></i> |                               |                               |                                 |         |
| Glucose (mg/dl)                        | 211.9 $\pm$ 11.8              |                               | 210.5 $\pm$ 13.5                | 0.936   |
| Lactate (mg/dl)                        | 104.5 $\pm$ 7.2               |                               | 126.4 $\pm$ 4.6*                | 0.025   |
| Muscular lactate (mg/g bm)             | 51.5 $\pm$ 2.03               |                               | 59.0 $\pm$ 1.72*                | 0.015   |
| Triglycerides (mg/dl)                  | 2.7 $\pm$ 0.32                |                               | 2.75 $\pm$ 0.25                 | 0.836   |
| Free fatty acids (nmol/ $\mu$ l)       | 0.54 $\pm$ 0.119              |                               | 0.635 $\pm$ 0.114               | 0.549   |
| Cortisol (ng/ml)                       | 235.2 $\pm$ 44.6              |                               | 246.7 $\pm$ 19.4                | 0.818   |
| Growth hormone (ng/ml)                 | 11.13 $\pm$ 4.8               |                               | 12.0 $\pm$ 2.43                 | 0.874   |
| Insulin-like growth factor-I (ng/ml)   | 72.2 $\pm$ 6.14               |                               | 72.0 $\pm$ 6.20                 | 0.983   |
