# Supplementary material for: Targeting the Mild-Hypoxia Driving Force for Metabolic and Muscle Transcriptional Reprogramming of Gilthead Sea Bream (Sparus aurata) Juveniles
Source: MDPI journal article supplement (doi:10.3390/biology10050416), 2021-05-08
Supplement: s1 [file s1]

**Table S2.** Statistics of the mapping of RNA-seq libraries.

| Group                            | Raw reads   | Total clean reads  | Total mapped reads   | Unique mapped reads | Multiple mapped reads | Unmapped reads      |
|----------------------------------|-------------|--------------------|----------------------|---------------------|-----------------------|---------------------|
| T <sub>+45H</sub> -N (x6)        | 93,962,710  | 91,112,977 (100%)  | 75,992,423 (83.40%)  | 56,420,759 (61.92%) | 19,571,664 (21.48%)   | 15,120,554 (16.60%) |
| T <sub>+45H</sub> -N-PF (x6)     | 106,280,617 | 103,264,916 (100%) | 85,542,148 (82.84%)  | 62,918,817 (60.93%) | 22,623,331 (21.91%)   | 17,722,768 (17.16%) |
| T <sub>+45H</sub> -M-HYP (x6)    | 111,987,385 | 109,287,035 (100%) | 90,248,445 (82.58%)  | 66,082,408 (60.47%) | 24,166,037 (22.11%)   | 19,038,590 (17.42%) |
| T <sub>+45H</sub> -Ex-N (x6)     | 113,249,761 | 109,802,281 (100%) | 90,724,845 (82.63%)  | 67,297,236 (61.29%) | 23,427,609 (21.34%)   | 19,077,436 (17.37%) |
| T <sub>+45H</sub> -Ex-N-PF (x6)  | 106,192,018 | 103,642,199 (100%) | 86,316,417 (83.28%)  | 63,380,774 (61.15%) | 22,935,643 (22.13%)   | 17,325,782 (16.72%) |
| T <sub>+45H</sub> -Ex-M-HYP (x6) | 104,507,973 | 101,731,147 (100%) | 84,192,210 (82.76%)  | 62,282,546 (61.22%) | 21,909,664 (21.54%)   | 17,538,937 (17.24%) |
| T <sub>+21N</sub> -N (x7)        | 122,629,685 | 119,165,470 (100%) | 98,043,378 (82.27%)  | 72,890,156 (61.17%) | 25,153,222 (21.11%)   | 21,122,092 (17.73%) |
| T <sub>+21N</sub> -M-HYP (x7)    | 125,560,548 | 121,690,996 (100%) | 100,665,832 (82.72%) | 74,463,326 (61.19%) | 26,202,506 (21.53%)   | 21,025,164 (17.28%) |

T<sub>+45H</sub>, T<sub>+45H</sub>-Ex and T<sub>+21N</sub> correspond to experimental groups conditioning, Exercise in T<sub>+45H</sub> and Exercise in T<sub>+21N</sub>, respectively. N, N-PF and M-HYP correspond to the different fish conditions: Normoxia, normoxia pair-feed and mild-hypoxia, respectively.
