# Supplementary material for: Targeting the Mild-Hypoxia Driving Force for Metabolic and Muscle Transcriptional Reprogramming of Gilthead Sea Bream (Sparus aurata) Juveniles
Source: Biology (Basel). 2021 May 8;10(5):416. doi: 10.3390/biology10050416 (PMC8151949; doi:10.3390/biology10050416)
Supplement: Supplementary file 1 [file biology-10-00416-s001.zip › Table S3. Heatmaps UP DOWN expressed genes and categories.xlsx]

## Sheet: TS4 A
Supplementary Table 4a. Differentially expressed genes and associated enriched pathways. 1: Small molecule metabolic process, 2: Tissue development, 3: Apoptotic signaling pathway, 4: Vesicle-mediated transport.
Genome Name	Best Description		M-Hyp/N log2FC	M-Hyp/N-PF log2FC	N-PF/N log2FC	Enriched pathway
g44153.t1	2-acylglycerol O-acyltransferase 2-A-like	mogat2	0.691494	0.273762	-0.96742	1
g68978.t1	Alcohol dehydrogenase class-3	adh5	0.657668	1.09419	-1.7431	1
g85390.t1	prostaglandin E synthase 3	ptges3	0.549501	-0.240945	0.801382	1
g88890.t1	Long-chain-fatty-acid--CoA ligase 1	acsl1	0.181773	-0.28682	0.476386	1
g81187.t1	Farnesyl pyrophosphate synthase	fdps	0.146297	-0.622219	0.768196	1
g80550.t1	Diphosphomevalonate decarboxylase	mvd	0.0839137	-0.604556	0.699546	1
g62870.t1	NADP-dependent malic enzyme	me1	0.0508457	0.439921	-0.475775	1
g4916.t1	Carnitine O-palmitoyltransferase 2, mitochondrial	cpt2	0.0289217	-1.31696	1.33841	1
g96881.t1	Adenylyltransferase and sulfurtransferase MOCS3	mocs3	1.13158	-0.0294437	1.1622	1
g77740.t1	Methylmalonic aciduria and homocystinuria type C protein homolog	mmachc	0.706031	-0.560015	1.27219	1
g34398.t1	Zinc finger and BTB domain-containing protein 20	zbtb20	0.631925	1.35065	-0.705435	1
g2044.t1	ATP-sensitive inward rectifier potassium channel 11	kcnj11	0.516243	-0.00395465	0.519847	1
g92974.t1	NADH dehydrogenase [ubiquinone] 1 beta subcomplex subunit 5, mitochondrial (KC217580)	ndufb5	0.390065	0.687927	-0.327386	1
g80494.t1	Adenylate kinase 2, mitochondrial	ak2	0.156212	0.590691	-0.435045	1
g96761.t1	Glycine N-methyltransferase	gnmt	-0.010757	-0.633779	0.619673	1
g29773.t1	INTER-ALPHA-TRYPSIN INHIBITOR HEAVY CHAIN H6	itih6	-0.138019	0.584716	-0.717758	1
g9939.t1	Acyl-coenzyme A thioesterase 9, mitochondrial	acot9	-0.30529	0.341496	-0.638801	1
g57954.t1	Glycerol-3-phosphate dehydrogenase 1-like protein	gpd1l	-0.45284	-0.768993	0.312775	1
g51991.t1	glycerophosphodiester phosphodiesterase 1-like	gde1	-0.486582	-1.40638	0.871839	1
g87451.t1	Iron-sulfur cluster assembly enzyme ISCU, mitochondrial	iscu	-0.682774	-0.661191	-0.023157	1
g45453.t1	1-acylglycerol-3-phosphate O-acyltransferase ABHD5	abhd5	-0.971885	1.05429	-2.03226	1
g12212.t1	Inositol monophosphatase 1	impa1	-1.05683	-1.53914	0.474048	1
g93615.t1	Retinoid isomerohydrolase	rpe65	-1.15942	0.807602	-1.9775	1
g32792.t1	cytochrome c oxidase subunit 5B, mitochondrial-like	cox5b	-1.87331	-2.04652	0.173143	1
g38243.t1	Abhydrolase domain-containing protein 16A	abhd16a	-3.21504	-2.48368	-0.734031	1
g51005.t1	Putative deoxyribose-phosphate aldolase	dera	-1.59156	-1.37195	-0.219399	1
g13334.t1	3-ketoacyl-CoA thiolase B, peroxisomal	acaa1	2.16747	2.59709	0.426987	1
g91363.t1	Diacylglycerol O-acyltransferase 2	dgat2	1.35577	0.142633	-1.22384	1
g93171.t1	Peroxisome proliferator-activated receptor gamma	pparg	0.919546	0.295451	-1.21299	1
g54569.t1	Catechol O-methyltransferase	comt	1.96083	0.940589	1.02738	1
g86463.t1	Enolase (Fragment)	eno1	-0.782248	-0.620778	-0.160142	1
g99840.t1	Proteasome activator complex subunit 2	psme2	-0.639018	-0.320853	-0.322577	1,2
g54706.t1	Retinol-binding protein 2	rbp2	-0.750861	0.871741	-1.62839	1,2
g4129.t1	CARBONYL REDUCTASE [NADPH] 1-LIKE ISOFORM X2	cbr1	-1.04084	0.353043	-1.39687	2
g84342.t1	TITIN HOMOLOG ISOFORM X2	ttn	1.0003	1.05042	0.0984499	2
g1858.t1	Casein kinase II subunit beta	csnk2b	0.375173	-0.375218	0.753776	2
g56136.t1	Myosin regulatory light chain 2, skeletal muscle isoform type 2	mylpf	-0.629156	0.232101	-0.852555	2
g95868.t1	C-X-C chemokine receptor type 4 (Fragment)	cxcr4	-0.894659	0.148588	-1.04199	2
g84021.t1	Eyes absent homolog 1	eya1	1.08096	1.32726	-0.224891	2
g81195.t1	histone-lysine N-methyltransferase ASH1L isoform X3	ash1l	0.981383	0.966468	-0.00299921	2
g38836.t1	USP6 N-terminal-like protein	usp6nl	0.781448	1.15984	-0.362964	2
g92618.t1	nodal homolog 2-A-like	nodal	0.349213	-0.364769	0.707256	2
g76762.t1	Heme oxygenase 2	hmox2	-0.0191796	0.491841	-0.508848	2
g2091.t1	Vacuolar protein sorting-associated protein 16 homolog	vps16	-0.0763507	0.528153	-0.597445	2
g63354.t1	protocadherin-15-like	pcdh15	-0.0914191	-1.14744	1.05118	2
g81152.t1	Protein S100-A10	s100a10	-0.311486	0.164146	-0.484186	2
g83243.t1	Methylosome protein 50	wdr77	-0.377783	-1.07892	0.714769	2
g46636.t1	T-box transcription factor TBX4	tbx4	-0.392778	1.06335	-1.4434	2
g19274.t1	Alpha-actinin-1	actn1	-0.528597	0.376075	-0.894993	2
g22857.t1	Acetylcholine receptor subunit delta	chrnd	-0.580828	0.279282	-0.855264	2
g19607.t1	Claudin-5	cldn5	-0.63679	0.00106154	-0.628207	2
g99002.t1	Supervillin	svil	-0.639373	-0.0496189	-0.582959	2
g74124.t1	Musculoskeletal embryonic nuclear protein 1	mustn1	-0.744458	-0.439602	-0.302169	2
g99739.t1	Cathepsin B	ctsb	-0.761653	0.281244	-1.03693	2
g64072.t1	Beta-1,4-galactosyltransferase 1	b4galt1	-0.854178	-0.55594	-0.299896	2
g88299.t1	Cytokine-like protein 1	cytl1	-0.905958	-0.652167	-0.260386	2
g46279.t1	titin-like, partial	ttn	-1.02578	-2.02954	0.978111	2
g53564.t1	Membrane-associated progesterone receptor component 1	pgrmc1	-1.27193	-0.812877	-0.4748	2
g27708.t1	ADP-ribosylation factor-like protein 4D	arl4d	-1.43988	0.00492646	-1.44316	2
g25164.t1	PDZ domain-containing protein 7-like, partial	pdzd7	-1.53655	0.274112	-1.80728	2
g23754.t1	AP-5 complex subunit sigma-1	ap5s1	-2.07359	-1.02246	-1.03836	2
g65793.t1	IGG RECEPTOR FCRN LARGE SUBUNIT P51 ISOFORM X1	fcgrt	-2.0789	-1.52637	-0.538997	2
g45391.t1	Proteoglycan 4	prg4	-2.32012	-1.39721	-0.918178	2
g16455.t1	Growth/differentiation factor 8 (myostatin)	mstn	1.03853	0.363536	0.665731	2
g2694.t1	Periostin	postn	-0.75434	-0.33584	-0.417286	2
g83607.t1	PLASMA MEMBRANE CALCIUM-TRANSPORTING ATPASE 1 ISOFORM X2	atp2b1	0.920928	1.01882	-0.102306	3
g28426.t1	dual specificity tyrosine-phosphorylation-regulated kinase 2 isoform X2	dyrk2	-0.523434	0.853608	-1.38306	3
g58947.t1	Clusterin	clu	-0.392474	0.21039	-0.600211	3
g99058.t1	F-box/WD repeat-containing protein 7 isoform X1	fbxw7	-1.71583	0.515616	-2.23454	3
g78361.t1	Apoptosis-enhancing nuclease	aen	0.0732592	-0.712184	0.787755	3
g29765.t1	G0/G1 switch protein 2	g0s2	-0.558696	1.21706	-1.7849	3
g60881.t1	Putative lymphocyte G0/G1 switch protein 2	g0s2	-1.03583	0.582191	-1.63297	3
g4762.t1	SNW domain-containing protein 1	snw1	-1.10564	-1.05016	-0.0530663	3
g58527.t1	Programmed cell death protein 6	pdcd6	-0.747418	-0.591152	-0.158186	3
g58173.t1	Plasminogen activator inhibitor 1	serpine1	-0.849285	-0.946111	0.102547	3
g75325.t1	tetraspanin-3-like	tspan3	-0.450098	-0.816982	0.385541	3
g12793.t1	Galectin-3	lgals3	-0.400284	-1.3071	0.904916	3.4
g84350.t1	Pro-cathepsin H	ctsh	-1.13178	-0.901815	-0.223465	3.4
g54159.t1	Vacuolar protein sorting-associated protein 45	vps45	0.971845	1.51186	-0.542976	4
g24801.t1	Tumor susceptibility gene 101 protein	tsg101	0.516913	0.428165	-0.941138	4
g65078.t1	Vacuolar-sorting protein SNF8	snf8	0.298813	0.329795	0.617563	4
g34312.t1	Disabled homolog 2	dab2	-0.459436	0.149185	-0.606634	4
g90214.t1	TGF-beta receptor type-2	tgfbr2	-0.729654	-0.413183	-0.316239	4
g60720.t1	actin-related protein 2/3 complex subunit 4 isoform X13	arpc4	1.02232	-1.05222	2.07104	4
g95403.t1	Ubiquitin-60S ribosomal protein L40	uba52	-0.90461	-1.7476	0.841426	4
g67871.t1	Caveolin-1	cav1	0.685507	-0.999149	0.31085	4
g18587.t1	Conserved oligomeric Golgi complex subunit 5	cog5	1.95168	0.908208	1.0456	4
g90369.t1	TORSIN-4A-B-LIKE	tor4a	-0.47447	-1.37184	0.901413	4
g76247.t1	ZINC FINGER PROTEIN 366	znf366	0.0991081	0.667059	-0.573818
g36133.t1	Coiled-coil-helix-coiled-coil-helix domain-containing protein 10, mitochondrial	chchd10	0.813974	0.969457	-0.137962
g74623.t1	TCF3 fusion partner homolog	tfpt	-1.59766	-2.23201	0.632511
g96787.t1	uncharacterized protein LOC102356998	loc102356998	1.98954	1.71596	0.283177
g11779.t1	uncharacterized protein LOC104961085, partial	loc104961085	1.29793	1.60424	-0.327539
g25937.t1	26S proteasome complex subunit DSS1	dss1	1.28446	0.872871	0.406967
g8346.t1	Cytochrome P450 1A1	cyp1a	1.28117	1.79573	-0.511351
g93582.t1	Uncharacterized protein KIAA0146	kiaa0146	1.15528	-1.68537	2.83614
g69493.t1	GRB10-INTERACTING GYF PROTEIN 1 ISOFORM X1	gigyf1	1.06131	1.02484	0.0165773
g35924.t1	myomegalin-like	pde4dipl	1.05391	1.32313	-0.260398
g74505.t1	Transcription elongation factor 1 homolog	elof1	1.05181	0.707611	0.337958
g53084.t1	Tetratricopeptide repeat protein 27	ttc27	1.0486	-1.13084	2.178
g93091.t1	Poly(rC)-binding protein 2	pcbp2	1.0347	0.390233	0.635704
g4723.t1	LYR motif-containing protein 5	lyrm5a	1.01406	1.01683	-0.00580542
g52746.t1	Homeobox protein Hox-D11a	hoxd11a	0.959292	1.28211	-0.338052
g81053.t1	Solute carrier family 25 member 40	slc25a40	0.928274	0.10189	0.820239
g48926.t1	Helicase ARIP4	rad54l2	0.878929	0.452714	0.402457
g89186.t1	probable GPI-anchored adhesin-like protein PGA55 isoform X1	pga55	0.81945	-1.64248	2.47977
g16005.t1	Nardilysin	nrd1	0.759595	0.408701	0.352981
g45913.t1	Activator of basal transcription 1	abt1	0.754199	0.437409	0.315799
g36039.t1	CUGBP Elav-like family member 1-B	celf1b	0.731003	1.11217	-0.381352
g70363.t1	REGULATOR OF G-PROTEIN SIGNALING 5-LIKE	rgs5	0.723958	1.15513	-0.427921
g54668.t1	RHO GTPASE-ACTIVATING PROTEIN 28	arhgap28	0.646117	1.89574	-1.24582
g66652.t1	Nuclear factor of activated T-cells, cytoplasmic 3	nfatc3	0.619051	0.789846	-0.178274
g62051.t1	Protein LSM12 homolog A	lsm12a	0.598036	0.0840532	0.501277
g19934.t1	Regulator of nonsense transcripts 2	upf2	0.591921	0.887015	-0.305888
g16033.t1	ATP-binding cassette sub-family E member 1	abce1	0.553368	-0.773821	1.3264
g89114.t1	Lysine-specific demethylase NO66	no66	0.541592	0.821939	-0.275793
g55058.t1	Nuclear migration protein nudC	nudc	0.521718	-0.193621	0.653283
g42132.t1	ecto-NOX disulfide-thiol exchanger 2-like	enox2	0.48608	1.35667	-0.872937
g96677.t1	Na(+)/H(+) exchange regulatory cofactor NHE-RF1	nherf1	0.446968	-0.640542	1.08544
g14045.t1	UPF0369 protein C6orf57	upf0369	0.428955	0.60531	-0.186492
g27601.t1	Signal recognition particle 9 kDa protein	srp9	0.399649	-0.363002	0.746035
g11058.t1	Nucleophosmin	nd2	0.335168	-0.528183	0.810337
CDS_not_predicted	small integral membrane protein 11A-like [Lates calcarifer]	smim11a	0.319813	-0.34416	0.667794
g79825.t1	PC4 and SFRS1-interacting protein	psip1	0.278675	-0.454745	0.709223
g22786.t1	RNA-binding protein EWS isoform X1	ews	0.265886	-0.26103	0.526436
g10824.t1	Cyclin-G2	ccng2	0.264131	1.34481	-1.08776
g40885.t1	dynein heavy chain 7, axonemal [Strongylocentrotus purpuratus]	dnah7	0.219871	-3.67869	3.89881
g71736.t1	Putative cytochrome b-c1 complex subunit Rieske-like protein 1	uqcrfs1p1	0.201549	0.887527	-0.682355
g32341.t1	Dehydrogenase/reductase SDR family member 12	dhrs12	0.200932	-0.729188	0.93383
g50921.t1	Mitochondrial import receptor subunit TOM5 homolog (JX975238)	tomm5	0.196362	0.630059	-0.444601
g82121.t1	Ran GTPase-activating protein 1	rangap1	0.189359	-0.391097	0.585323
g36583.t1	major histocompatibility complex class I-related gene protein-like, partial	mr1	0.134411	-0.444299	0.583058
g93909.t1	IQ domain-containing protein K	iqck	0.0945333	0.973712	-0.875798
g58524.t1	Importin-4	ipo4	0.0786974	-0.780381	0.851345
g49281.t1	uncharacterized protein LOC106536431, partial	loc106536431	0.0569986	-1.0338	1.0853
g77287.t1	Guanine nucleotide-binding protein-like 3	gnl3	0.0528653	-0.654762	0.696329
g64945.t1	EF-hand calcium-binding domain-containing protein 7	efcab7	0.037931	0.531318	-0.502284
g90413.t1	Tetratricopeptide repeat protein 16	ttc16	0.00859688	1.29601	-1.28678
g33213.t1	HLA class II histocompatibility antigen, DRB1-11 beta chain	hla-drb1	-0.00302088	0.566495	-0.593083
g95547.t1	nucleolin	ncl	-0.00315943	-0.725483	0.695123
g66767.t1	CCA tRNA nucleotidyltransferase 1, mitochondrial	trnt1	-0.0176319	-0.838885	0.827714
g90713.t1	Protein arginine N-methyltransferase 3	prmt3	-0.0882577	-0.715068	0.625943
g61375.t1	rRNA 2'-O-methyltransferase fibrillarin	fbl	-0.0901764	-0.694726	0.605767
g12450.t1	Protein phosphatase 1L	ppm1l	-0.146384	2.12199	-2.26408
g67044.t1	Spermatid perinuclear RNA-binding protein	strbp	-0.198432	-0.814878	0.612615
g73045.t1	Splicing factor 45	rbm17	-0.202729	0.318279	-0.542518
g31560.t1	Uncharacterized protein C8orf4 homolog	c8orf4 homolog	-0.207616	0.657346	-0.872676
g68849.t1	Probable rRNA-processing protein EBP2	ebna1bp2	-0.216777	-0.854633	0.617768
g77819.t1	Glutathione peroxidase 4a	gpx4a	-0.221153	0.79895	-1.0306
g84651.t1	protein C3orf33 homolog	c3orf33	-0.265745	0.661454	-0.924589
g17539.t1	COILED-COIL DOMAIN-CONTAINING PROTEIN 34	ccdc34	-0.290755	-1.01049	0.681423
g74856.t1	homeobox protein Hox-D9a-like	hox-d9a	-0.304986	1.73739	-2.04664
g27019.t1	Pumilio domain-containing protein KIAA0020	kiaa0020	-0.305851	-1.09766	0.792609
g1127.t1	TUBULIN POLYMERIZATION-PROMOTING PROTEIN FAMILY MEMBER 3	tppp3	-0.319411	0.64339	-0.970075
g91494.t1	Kaptin	kptn	-0.354201	0.236285	-0.598038
g24701.t1	S-adenosylmethionine synthase-like	sam1	-0.422752	0.317113	-0.72692
g6774.t1	Probable D-tyrosyl-tRNA(Tyr) deacylase 2	dtd2	-0.426875	-1.55663	1.12073
g50.t1	Pleckstrin homology-like domain family A member 1	phlda1	-0.439867	0.681322	-1.12
g56433.t1	UPF0667 protein C1orf55 homolog	upf0667	-0.440691	-0.976268	0.534638
g50908.t1	Pre-mRNA-processing factor 19	prpf19	-0.45884	-1.03212	0.567459
g16262.t1	zinc finger and BTB domain-containing protein 11	zbtb11	-0.47928	0.135765	-0.614546
g75538.t1	DnaJ homolog subfamily A member 1	dnaja1	-0.480411	0.151154	-0.637551
g2752.t1	MAP3K7 C-terminal-like protein	map3k7cl	-0.492886	0.456689	-0.947228
g83980.t1	Leucine-rich repeat-containing protein 67	lrrc67	-0.496322	0.633584	-1.12753
g86140.t1	GUANINE NUCLEOTIDE-BINDING PROTEIN G(I)/G(S)/G(O) SUBUNIT GAMMA-10	gng10	-0.501107	0.26643	-0.771099
g27781.t1	Target of Nesh-SH3	abi3bp	-0.522023	-0.636771	0.122197
g38899.t1	Cleavage stimulation factor subunit 1	cstf1	-0.566948	-0.819564	0.256811
g98535.t1	T-complex protein 1 subunit zeta-2	cct6b	-0.583736	-0.36245	-0.224926
g8480.t1	F-box only protein 2	fbxo17	-0.595477	0.466418	-1.0492
g74714.t1	microfibrillar-associated protein 2 isoform X1	mfap2	-0.596178	-0.463026	-0.12692
g94696.t1	S1 RNA-binding domain-containing protein 1	srbd1	-0.598735	-0.581405	-0.0422576
g55856.t1	carbonic anhydrase 4-like	ca4	-0.602398	0.807461	-1.41485
g67978.t1	HLA CLASS II HISTOCOMPATIBILITY ANTIGEN, DRB1-8 BETA CHAIN-LIKE	hla-drb1	-0.614178	-0.0696728	-0.531809
g23636.t1	DNA damage-inducible transcript 4-like protein	ddit4l	-0.625296	-0.048678	-0.55917
g34746.t1	hypothetical protein LOC568145 [Danio rerio]	loc568145	-0.632698	0.581244	-1.21263
g90450.t1	Glutathione S-transferase theta-4	gstt4	-0.68851	0.455039	-1.13715
g74431.t1	uncharacterized protein LOC102215651	loc102215651	-0.691716	-0.00244591	-0.682291
g68980.t1	Alcohol dehydrogenase 1	adh1	-0.704042	0.286366	-0.98337
g66082.t1	UPF0500 protein C1orf216 homolog isoform X2	upf0500	-0.720462	-0.281345	-0.442844
g87969.t1	PROTEIN AAR2 HOMOLOG	aar2	-0.733515	-0.50738	-0.222961
g32071.t1	CD209 antigen-like protein 2	cd209l2	-0.760934	-0.890304	0.132399
g46834.t1	L antigen family member 3	lage3	-0.80179	-0.432159	-0.369125
g19324.t1	Stonustoxin subunit beta	sntx_beta	-0.809048	0.402086	-1.20895
nc-RNA	PUTATIVE_small_RNA, ENSTRUT00000048779,SNORD26,snoRNA, ENSONIT00000027535,SNORD29,snoRNA, ENSORLT00000026612,SNORD30,snoRNA, ENSPFOT00000021264,SNORD22,snoRNA, ENSGACT00000029182,snoRNA	ensonit00000027535	-0.816354	0.171177	-0.981267
g90080.t1	Histone-lysine N-methyltransferase MLL	mll	-0.818676	0.427652	-1.23185
g14858.t1	Monocarboxylate transporter 7	slc16a6	-0.81899	0.797309	-1.62398
g53656.t1	Serine/arginine-rich splicing factor 4	srsf4	-0.822379	-0.260167	-0.563105
g21305.t1	coiled-coil domain-containing protein 106-like	ccdc106	-0.82519	-0.0901513	-0.730716
g88056.t1	Glycerol-3-phosphate dehydrogenase [NAD+], cytoplasmic	gdp1	-0.830387	0.0868001	-0.913745
CDS_not_predicted	GSK-3-binding protein-like	frat2	-0.846227	-0.733734	-0.111525
g45593.t1	uncharacterized protein LOC110523749	loc110523749	-0.847799	-1.44894	0.596319
g92114.t1	Uncharacterized protein C8orf59	c8orf59	-0.861886	0.0334241	-0.903921
g21021.t1	glutathione S-transferase A	gsta	-0.894566	0.129691	-1.03329
g30640.t1	Macrophage-capping protein	capg	-0.894621	-1.5955	0.711015
g46201.t1	Interferon regulatory factor 1	irf1	-0.912314	-0.61193	-0.302019
g76125.t1	Arrestin domain-containing protein 2	arrdc2	-0.922984	-0.579739	-0.34228
g7873.t1	Keratin, type I cytoskeletal 50 kDa	k1c1	-0.92934	-1.57842	0.655931
g76697.t1	Non-structural maintenance of chromosomes element 1 homolog	nsmce1	-0.960585	-1.21558	0.252208
g23441.t1	Angiopoietin-related protein 7	angptl7	-0.961892	-0.470914	-0.47904
g86354.t1	Glutathione peroxidase 2	gpx2	-0.978814	-1.30015	0.309576
g13695.t1	Methyltransferase-like protein 12, mitochondrial	mettl12	-0.985899	-0.22291	-0.767656
g16449.t1	Probable tRNA threonylcarbamoyladenosine biosynthesis protein osgepl1	osgepl1	-0.988139	0.585808	-1.56078
g40872.t1	Ependymin-2	epd2	-0.990353	0.190173	-1.17617
g56094.t1	SWI/SNF-related matrix-associated actin-dependent regulator of chromatin subfamily D member 2	smarcd2	-0.993933	-0.700153	-0.302271
g43310.t1	uncharacterized protein LOC103355182	loc103355182	-1.00576	-0.355946	-0.6547
g83156.t1	RuvB-like 1	ruvbl1	-1.02	-0.763017	-0.260793
g95964.t1	Dehydrogenase/reductase SDR family member 1	dhrs1	-1.04498	-0.516863	-0.527235
g70572.t1	Troponin C, skeletal muscle	tnnc2	-1.0489	-0.0419679	-1.00162
g83369.t1	RNA pseudouridylate synthase domain-containing protein 4	rpusd4	-1.05114	-0.437891	-0.612084
g79460.t1	Apolipoprotein Eb (KX122020)	apoeb	-1.12075	-1.52714	0.410083
g89835.t1	CD209 ANTIGEN-LIKE PROTEIN E	cd209e	-1.15556	0.00172984	-1.17932
g99422.t1	Podocan	podn	-1.16803	0.241008	-1.40997
g74144.t1	Cell death activator CIDE-3	cidec	-1.19435	-0.087412	-1.11824
g90788.t1	Troponin T, fast skeletal muscle	tnnt3	-1.39167	-0.801118	-0.604068
g69870.t1	Amine oxidase [flavin-containing]	mao	-1.432	-0.321535	-1.11025
nc-RNA	ENSONIT00000027720,lincRNA	ensonit00000027720	-1.46166	-0.855828	-0.601801
g4565.t1	Dermatopontin	dpt	-2.31658	0.0975986	-2.40552
g97062.t1	Actin-6 (Fragment)	act6	-2.3538	0.0849158	-2.41635
g49126.t1	LYMPHOCYTE ANTIGEN 6G-LIKE	ly6g	-2.53886	-1.27358	-1.26433
g90278.t1	Histone-lysine N-methyltransferase EHMT2	ehmt2	-2.92184	-3.689	0.771461
g24759.t1	SUMO-activating enzyme subunit 1	sae1	-3.40955	-4.18153	0.761157
g3589.t1	Myosin phosphatase Rho-interacting protein	mprip	-5.7819	-3.99217	-1.78169

## Sheet: TS4 B
Supplementary Table 4b. Differentially expressed genes and associated enriched pathways. 1: Muscle contraction, 2: Generation of precursor metabolites and energy, 3: Regulation of ATPase activity.
Genome Name	Best Description	Gene symbol	M-Hyp/N log2FC	M-Hyp/N-PF log2FC	N-PF/N log2FC	Enriched pathway
g45261.t1	GTPase KRas	kras	1.08374	0.929346	0.156293	1
g40431.t1	ACTIN, AORTIC SMOOTH MUSCLE	acta2	-0.405286	0.338969	-0.744679	1
g78530.t1	Alpha-actinin-2	actn2	-4.37054	-4.45319	0.0683278	1
g48753.t1	ACTIN-RELATED PROTEIN 3B-LIKE ISOFORM X1	actr3	0.364995	-0.533539	1.1444	1
g43931.t1	actin-related protein 3-like	actr3	0.492368	-1.50974	1.03134	1
g40641.t1	Myosin-binding protein C, slow-type	mybpc1	-5.18063	-5.8304	0.63414	1
g86474.t1	Myosin-1	myh1	-3.24875	-4.15951	-0.907441	1
g35693.t1	Myosin-7	myh7	-4.65843	-5.53238	-0.860016	1
g1135.t1	myosin light chain kinase, smooth muscle-like	mylk	-1.39968	-1.03086	-0.374212	1
g94116.t1	Myosin regulatory light chain 2, skeletal muscle isoform type 2	mylpf	0.4421	-1.76107	1.31327	1
g11644.t1	Nck-associated protein 1	nckap1	0.660783	0.139355	0.526204	1
g95048.t1	Sorbin and SH3 domain-containing protein 1	sorbs1	-0.107335	-0.581504	0.477683	1
g94290.t1	Telethonin	tcap	-0.891545	-1.27452	-0.37976	1
g70572.t1	Troponin C, skeletal muscle	tnnc2	-0.559698	-0.724533	-0.173262	1
g83615.t1	Troponin I, slow skeletal muscle	tnni1	-4.51011	-3.91975	-0.604576	1
g28143.t1	Troponin I, fast skeletal muscle	tnni2	-1.45234	-1.27465	-0.172433	1
g90776.t1	troponin I, fast skeletal muscle-like isoform X1	tnni2	-1.34885	-0.721009	-0.627373	1
g20577.t1	Tropomyosin alpha-3 chain	tpm3	-3.57034	-3.34653	-0.228922	1
g2334.t1	tropomyosin alpha-4 chain-like isoform X2	tpm4	-0.806523	-1.02613	-0.219004	1
g87409.t1	anthrax toxin receptor 1-like	antxr1	-0.174143	0.982708	-1.1553	1
g854.t1	SARCOPLASMIC/ENDOPLASMIC RETICULUM CALCIUM ATPASE 1 ISOFORM X1	atp2a1	-4.47986	-4.60492	0.109483	1
g82252.t1	Brain-specific angiogenesis inhibitor 1-associated protein 2-like protein 2	baiap2l2	-4.74988	-4.0016	-0.765129	1
g87800.t1	F-actin-capping protein subunit alpha-1	capza1	-0.33227	-0.83416	0.508402	1
g73451.t1	Calsequestrin-2	casq2	-2.82691	-1.61625	-1.21582	1
g67871.t1	Caveolin-1	cav1	1.37202	-0.062	-0.39537	1
g74192.t1	Dysbindin	dtnbp1	-1.12047	-0.61368	-0.502825	1
g26263.t1	emerin-like	emd	-0.397998	0.651688	-1.04635	1
g17362.t1	FH1/FH2 domain-containing protein 3	fhod3	-5.85156	-1.44989	-1.08974	1
g34151.t1	FH1/FH2 domain-containing protein 3-like isoform X1	fhod3	-1.24685	-4.75925	-0.196261	1
g74934.t1	Kelch repeat and BTB domain-containing protein 10	klhl41	-2.28679	-2.29181	-0.00796665	1
g7874.t1	Keratin, type I cytoskeletal 19	krt19	-1.80114	-1.51668	-0.282008	1
g15627.t1	leiomodin-2-like, partial	lmod2	-1.82668	-1.09504	-0.737407	1
g74568.t1	Myoglobin	mb	4.50427	2.1497	2.36713	1
g96146.t1	Myoferlin	myof	-0.550549	-0.26081	-0.292714	1
g26942.t1	Rap guanine nucleotide exchange factor 3	rapgef3	-0.684881	0.0366969	-0.719274	1
g86172.t1	Protein SDA1 homolog	sdad1	1.01081	0.469782	0.541544	1
g44927.t1	Sodium- and chloride-dependent creatine transporter 1	slc6a8	0.417016	-0.507755	0.918317	1
g87889.t1	Sarcolemmal membrane-associated protein	slmap	-1.19925	-1.13763	-0.066638	1
g65313.t1	Dual specificity testis-specific protein kinase 2	tesk2	-1.11443	-0.611538	-0.500791	1
g77643.t1	Xin actin-binding repeat-containing protein 2	xirp2	0.376848	-0.563216	0.933095	1
g55534.t1	Tropomyosin beta chain	tpm2	-2.75176	-2.16701	-0.590057	1
g92518.t1	starch-binding domain-containing protein 1 isoform X1	stbd1	-0.599606	-0.541462	-0.0540801	1
g35697.t1	Myosin-6	myh6	-4.53744	-3.55505	-0.997098	1
g19809.t1	Troponin T, cardiac muscle isoforms	tnnt2	-3.42327	-2.54877	-0.890341	1
g90788.t1	Troponin T, fast skeletal muscle	tnnt3	-1.14255	-1.35967	-0.224425	1
g86073.t1	ATP synthase subunit alpha, mitochondrial (KC217601)	atp5f1a	-0.462736	-0.207388	-0.251688	2
g80820.t1	protein phosphatase 1 regulatory subunit 3D-like	ppp1r3d	0.629942	-0.114273	0.751047	2
g4313.t1	Sodium/potassium-transporting ATPase subunit alpha	atp1a1	-1.08665	-0.131029	-0.194845	2
g99075.t1	Sodium/potassium-transporting ATPase subunit alpha-1	atp1a1	-0.963949	-0.890345	-0.830588	2
g86900.t1	protein phosphatase 1 regulatory subunit 12B-like	ppp1r12b	-0.640136	0.299603	-0.939555	2
g33111.t1	Succinate-semialdehyde dehydrogenase, mitochondrial	aldh5a1	-0.0311983	-1.05901	1.02422	2
g77006.t1	Bisphosphoglycerate mutase	bpgm	-0.493059	-0.289987	-0.197826	2
g36133.t1	Coiled-coil-helix-coiled-coil-helix domain-containing protein 10, mitochondrial	chchd10	0.37782	0.714237	-0.332276	2
g4617.t1	lysosomal alpha-glucosidase-like	gaa	-0.647272	-1.10647	0.465109	2
g12805.t1	glyceraldehyde-3-phosphate dehydrogenase-like	gapdh	0.537633	0.0944251	-0.628592	2
g86793.t1	1,4-alpha-glucan-branching enzyme	gbe1	-0.412087	-0.657597	0.248617	2
g33408.t1	malate dehydrogenase, cytoplasmic isoform X1	mdh1	-2.00106	-2.23705	-0.234573	2
g33405.t1	Malate dehydrogenase, cytoplasmic	mdh1	-0.680553	-0.244575	-0.434981	2
g62869.t1	NADP-dependent malic enzyme, mitochondrial	me3	-0.613795	-0.773789	0.16193	2
g29137.t1	6-phosphofructo-2-kinase/fructose-2,6-biphosphatase	pfkfb1	0.0975251	-0.814938	0.922303	2
g85357.t1	6-phosphofructokinase, muscle type	pfkm	-0.819151	-0.898802	0.0816059	2
g88049.t1	Aladin	aaas	0.537428	0.834398	-0.294841	2
g6935.t1	acyl-CoA synthetase short-chain family member 3, mitochondrial	acss3	1.89701	-1.60051	3.49945	2
g68978.t1	Alcohol dehydrogenase class-3	adh5	1.358	-0.21863	-1.13922	2
g79192.t1	Copper-transporting ATPase 1	atp7a	0.834493	0.309199	0.530747	2
g22131.t1	Dimethylglycine dehydrogenase, mitochondrial	dmgdh	0.699902	0.240908	0.458452	2
g99843.t1	Dimethylglycine dehydrogenase, mitochondrial	dmgdh	1.12305	-0.176912	1.30433	2
g6515.t1	Glutaredoxin-related protein 5, mitochondrial	glrx5	-0.865597	-0.532266	-0.330556	2
g21792.t1	Mitochondrial inner membrane protease subunit 2	immp2l	0.296231	-0.479047	0.775533	2
g53523.t1	Myb-binding protein 1A-like protein	mybbp1a	0.690399	0.402945	0.287635	2
g69349.t1	NADH dehydrogenase [ubiquinone] 1 alpha subcomplex subunit 4-like 2 (KC217566)	ndufa4l2	-1.26047	2.0545	-3.31859	2
g80988.t1	Nuclear receptor subfamily 4 group A member 3	nr4a3	0.397348	-0.599282	0.999266	2
g9421.t1	Putative protein phosphatase 1 regulatory inhibitor subunit 3G	ppp1r3g	3.62636	6.09272	-2.48149	2
g87850.t1	Mitochondrial glutamate carrier 1	slc25a22	0.633523	-0.0758335	0.71589	2
g86953.t1	Mitochondrial glutamate carrier 1	slc25a22	0.915182	-1.65078	0.730185	2
g62632.t1	B-cell lymphoma 6 protein homolog	bcl6	-0.666281	-0.00122502	-0.66259	3
g75904.t1	myosin-binding protein C, cardiac-type isoform X7	mybpc3	5.02837	-4.27486	-0.76638	3
g87652.t1	Myosin light chain 3	myl3	-4.80989	-3.91132	-0.916094	3
g2583.t1	Nuclear receptor corepressor 1	ncor1	0.424921	-0.315601	0.738142	3
g38043.t1	Histone-lysine N-methyltransferase SETMAR	setmar	0.320633	1.13237	-0.807062	3
g85062.t1	Sarcolipin	sln	-3.12327	-2.53082	-0.601557	3
g28632.t1	hamartin-like isoform X1	tsc1	0.550769	-1.05661	1.60079	3
g45893.t1	Multidrug resistance-associated protein 5	abcc5	-1.03466	-2.54959	1.5157
g17251.t1	Monoacylglycerol lipase abhd6-A (JX975713)	abhd6a	-1.00882	1.38424	-2.39469
g27781.t1	Target of Nesh-SH3	abi3bp	-0.706914	-0.576823	-0.129566
g52797.t1	Acetyl-CoA carboxylase 1	acaca	-1.46264	-0.476351	-0.985382
g52469.t1	Long-chain specific acyl-CoA dehydrogenase, mitochondrial	acadl	-0.57175	0.216745	-0.785879
g73440.t1	C-X-C chemokine receptor type 7	ackr3	-0.595667	0.0707446	-0.667003
g92142.t1	Acyl-coenzyme A thioesterase 11	acot11	0.788037	0.269493	0.518521
g12403.t1	A disintegrin and metalloproteinase with thrombospondin motifs 1	adamts1	0.466906	1.39825	-0.935971
g68281.t1	activating transcription factor 7-interacting protein 2 isoform X2	aft7ip2	0.507538	0.541111	-0.0287775
g79694.t1	ADENOSYLHOMOCYSTEINASE 3 ISOFORM X1	ahcyl2	0.424716	-0.518209	0.944773
g19595.t1	mitochondrial 10-formyltetrahydrofolate dehydrogenase, partial	aldh1l2	0.865539	-0.422248	1.2872
g98875.t1	MITOCHONDRIAL 10-FORMYLTETRAHYDROFOLATE DEHYDROGENASE	aldh1l2	0.697504	-0.228959	0.92523
g81866.t1	Ankyrin-3	ank3	-0.27288	-1.96861	1.70111
g74249.t1	Ankyrin repeat domain-containing protein 1	ankrd1	-1.72555	-0.900951	-0.824742
g92229.t1	ankyrin repeat domain-containing protein 24	ankrd24	-1.0423	-0.166206	-0.876274
g57792.t1	ADP/ATP translocase 3	ant3	-3.17187	-2.38346	-0.797512
g46179.t1	AP-2 complex subunit beta	ap2b1	0.65835	-1.18325	1.84848
g95373.t1	Apolipoprotein O	apoo	-0.157323	1.14821	-1.30279
g57990.t1	protein app1-like [Maylandia zebra]	app1	-1.61724	0.951954	-2.56633
g97611.t1	N-acetylserotonin O-methyltransferase-like protein	asmtl	0.665287	0.401874	0.266929
g896.t1	Putative L-aspartate dehydrogenase	aspdh	-0.621477	-0.443468	-0.174868
g60591.t1	Probable cation-transporting ATPase 13A2	atp13a2	-0.0655826	-0.735707	0.675358
g82166.t1	ATP synthase subunit f, mitochondrial (KC217610)	atp5j2	-1.34988	0.211409	-1.557
g13173.t1	V-type proton ATPase subunit d 1	atp6v0d1	-0.805021	0.195847	-1.00108
g44920.t1	B-cell receptor-associated protein 31	bcap31	0.259731	-0.875701	1.13986
g20119.t1	bestrophin-3 isoform X1	best3	-0.77745	-1.41256	0.635895
g26920.t1	bridging integrator 2	bin2	0.871527	-1.23413	2.10935
g87415.t1	Transcription factor IIIB 50 kDa subunit	brf2	-0.883904	-0.284831	-0.598645
g58652.t1	Blood vessel epicardial substance	bves	0.595206	-0.548313	1.15005
g83289.t1	Bystin	bysl	0.333329	-0.809613	1.14991
g32165.t1	uncharacterized protein C2orf47 homolog, mitochondrial-like	c2orf47	0.316473	0.959534	-0.637899
g92114.t1	Uncharacterized protein C8orf59	c8orf59	-1.01204	-0.257323	-0.756152
g46074.t1	Uncharacterized protein C8orf76	c8orf76	-1.2211	-1.08997	-0.13021
g55856.t1	carbonic anhydrase 4-like	ca4	-2.31433	-1.63045	-0.681167
g98466.t1	cullin-associated NEDD8-dissociated protein 1-like	cand1	-0.536833	-1.13586	0.598839
g24662.t1	Cysteinyl-tRNA synthetase, cytoplasmic	cars	-0.616546	-0.770057	0.153951
g28619.t1	coiled-coil domain-containing protein 152 isoform X2	ccdc152	0.850519	-1.1227	1.97794
g82270.t1	coiled-coil domain-containing protein 85B	ccdc85b	-0.402114	-0.699406	0.297634
g83840.t1	Cell cycle progression protein 1	ccpg1	0.932575	0.203546	0.732045
g99173.t1	T-complex protein 1 subunit beta	cct2	-0.269974	-0.789629	0.521307
g1428.t1	Cat eye syndrome critical region protein 5 homolog	cecr2	0.767031	1.68646	-0.918887
g4688.t1	GALECTIN-2-LIKE	cgl2	-1.96818	-0.893273	-1.07702
g39259.t1	Carbohydrate sulfotransferase 7	chst7	0.671441	0.586763	0.0885507
g90163.t1	CIRCADIAN-ASSOCIATED TRANSCRIPTIONAL REPRESSOR-LIKE	ciart	-0.475987	-1.89951	1.41952
g83366.t1	cytokine-inducible SH2-containing protein-like	cish	1.43272	0.745612	0.684015
g19986.t1	dual specificity protein kinase CLK4-like isoform X1	clk4	-1.37197	-1.94817	0.576052
g78393.t1	Methylosome subunit pICln	clns1a	1.05967	0.722838	0.343322
g37083.t1	Protein cornichon homolog	cnih1	0.663061	1.23291	-0.573147
g14873.t1	conserved oligomeric Golgi complex subunit 1 isoform X1	cog1	0.732969	0.701712	0.0314273
g89538.t1	Collagen alpha-1(X) chain	col10a1	-1.35844	-1.23705	-0.115412
g54796.t1	collagen alpha-1(XII) chain-like, partial	col12a1	-0.244513	-1.37031	1.11499
g84796.t1	Collagen alpha-1(XIX) chain	col19a1	0.814695	-0.0726665	0.88541
g42893.t1	ATYPICAL KINASE ADCK3, MITOCHONDRIAL	coq8a	-0.603841	-0.658172	0.0566215
g3951.t1	ATYPICAL KINASE ADCK3, MITOCHONDRIAL-LIKE	coq8a	-0.891132	-0.644543	-0.254683
g99813.t1	cytochrome c oxidase subunit 7A-related protein, mitochondrial-like	cox7a	0.889343	1.95912	-1.06852
g70086.t1	caspase-3-like	cpp32	-1.34212	-0.672973	-0.666586
g8698.t1	Carnitine O-palmitoyltransferase 2, mitochondrial	cpt2	0.081	-0.052	-1.05547
g97059.t1	cysteine-rich motor neuron 1 protein-like [Oreochromis niloticus]	crim1	-0.736952	-0.227771	-0.502921
g86925.t1	Cysteine and glycine-rich protein 1	csrp1	-2.94733	-2.43728	-0.523545
g80648.t1	Cleavage stimulation factor subunit 3	cstf3	-0.203099	-0.964304	0.765379
g44292.t1	Cathepsin S	ctss	-1.02677	1.11146	-2.14262
g16295.t1	Cytochrome b ascorbate-dependent protein 3	cyb561a3	-0.422744	-2.06947	1.65193
g68817.t1	Protein CYR61	cyr61	0.594561	0.440293	0.154821
g67366.t1	protein CYR61-like	cyr61	-0.0813985	-0.876195	0.798869
g62601.t1	Cytohesin-3	cyth3	-1.90989	-1.15137	-0.75104
g24774.t1	DCN1-like protein 5	dcun1d5	-0.687061	-0.255465	-0.425869
g2861.t1	Probable ATP-dependent RNA helicase DDX52	ddx52	0.900889	0.359706	0.540101
g85196.t1	Density-regulated protein	denr	0.121917	-0.666559	0.793297
g51005.t1	Putative deoxyribose-phosphate aldolase	dera	-1.043	-0.836144	-0.204333
g76832.t1	dnaJ homolog subfamily B member 1	dnajb1	0.0614088	-1.02634	1.0867
g77001.t1	DnaJ homolog subfamily B member 9	dnajb9	-4.50329	-3.64536	-0.863244
g48284.t1	DnaJ homolog subfamily C member 24	dnajc24	-0.42905	-0.720544	0.294572
g32701.t1	tRNA-dihydrouridine synthase 1-like	dus1l	2.99036	3.2561	-0.261757
g90031.t1	tRNA-dihydrouridine synthase 3-like	dus3l	-1.11549	-0.357456	-0.757454
g15636.t1	RNA/RNP complex-1-interacting phosphatase	dusp11	0.75814	0.203212	0.557914
g10534.t1	Enoyl-CoA delta isomerase 1, mitochondrial	eci1	-0.31681	-0.690853	0.377612
g40025.t1	EH domain-binding protein 1-like protein 1	ehbp1l1	-0.221736	-0.901987	0.684953
nc-RNA	ENSAMXT00000028482,lincRNA	ensamxt00000028482	-1.83571	-1.84132	0.0106489
nc-RNA	PUTATIVE_small_RNA, ENSLOCT00000026819,lincRNA, ENSLOCT00000027024,lincRNA, ENSPFOT00000021544,miRNA	ensloct00000026819	-0.0015596	-0.731985	0.733805
g39800.t1	Ectonucleoside triphosphate diphosphohydrolase 2	entpd2	0.16686	-0.637577	0.808845
g55243.t1	Ependymin	epd	2.45361	-1.99369	4.45756
g40872.t1	Ependymin-2	epd2	-1.46208	-0.472678	-0.986503
g85657.t1	DNA EXCISION REPAIR PROTEIN ERCC-1	ercc1	-0.233341	0.660809	-0.890927
g16390.t1	endothelin-1-like	et1	1.66004	0.804671	0.866987
g64551.t1	Protein C-ets-1	ets1	-0.382353	0.321038	-0.70113
g70397.t1	Exosome complex component CSL4	exosc1	0.382235	-0.183758	0.570038
g55760.t1	Fatty acid-binding protein, adipocyte	fabp4	-0.641331	0.120797	-0.764079
g89526.t1	FATTY ACID-BINDING PROTEIN, BRAIN-LIKE	fabp7	-1.15668	-0.202246	-0.953308
g83041.t1	Fumarylacetoacetate hydrolase domain-containing protein 2	fahd2a	-1.45907	-0.549173	-0.908664
g94163.t1	Protein FAM117A	fam117a	0.535265	0.102148	0.437282
g15081.t1	protein FAM134B	fam134b	0.84334	-0.972869	1.80674
g78546.t1	protein FAM13A isoform X2	fam13a	-0.444445	-0.755021	0.317879
g79756.t1	protein FAM13A isoform X3	fam13a	-0.890969	-1.416	0.524331
g90295.t1	protein FAM167A-like [Oreochromis niloticus] &gt;gi|498977010|ref|XP_004549009.1| alanine and arginine-rich domain-containing protein-like [Maylandia zebra]	fam167a	-0.913215	1.86343	-2.76674
g792.t1	protein FAM83G-like	fam83g	-1.20991	-0.102763	-1.10299
g34746.t1	PROTEIN FAM89A-LIKE	fam89a	-0.916041	0.638994	-1.55199
g6845.t1	F-box only protein 40-like	fbxo40	-0.844867	-1.23807	0.397897
g79895.t1	F-BOX ONLY PROTEIN 41	fbxo41	-0.698428	-0.406928	-0.284878
g10295.t1	fibroblast growth factor 13 isoform X2	fgf13	0.487895	-0.228514	0.720789
g29849.t1	peptidyl-prolyl cis-trans isomerase FKBP11	fkbp11	-0.152268	0.568002	-0.71668
g28732.t1	Filamin-C	flnc	-0.827531	-1.26669	0.42927
g76619.t1	Feline leukemia virus subgroup C receptor-related protein 2	flvcr2	-1.32463	0.0561707	-1.37858
g69217.t1	FK506-binding protein 1	fpr1	-0.594042	-0.832518	0.243532
g61632.t1	FERM domain-containing protein 4B	frmd4b	-0.631582	-0.787422	0.15751
g59711.t1	Fucose mutarotase	fuom	-1.0348	-0.56388	-0.466787
g28980.t1	Fragile X mental retardation syndrome-related protein 2	fxr2	0.687492	0.0144457	0.676438
g29765.t1	G0/G1 switch protein 2	g0s2	-1.67354	0.265284	-1.94419
g41047.t1	growth arrest and DNA damage-inducible protein GADD45 beta	gadd45b	0.314831	-0.690655	1.00819
g87476.t1	galactosylceramide sulfotransferase-like	gal3st	-0.00678929	-0.681278	0.678841
g99299.t1	Polypeptide N-acetylgalactosaminyltransferase 11	galnt11	1.2362	0.86379	0.371505
g34305.t1	growth arrest-specific protein 1-like	gas1	-0.63231	0.689445	-1.32246
g28604.t1	Golgi-specific brefeldin A-resistance guanine nucleotide exchange factor 1	gbf1	-0.850275	0.087742	-0.933677
g70433.t1	GTPase IMAP family member 4-like isoform X2	gimap4	-0.79109	0.0803749	-0.870877
g88051.t1	Glutaminase kidney isoform, mitochondrial	gls	-0.100228	-0.731613	0.633633
g36968.t1	G patch domain-containing protein 4	gpatch4	0.750927	0.053286	0.699116
g39989.t1	Glypican-1	gpc1	0.606205	-0.0457849	0.654741
g9412.t1	Glutathione peroxidase 7	gpx7	0.993244	0.7633	0.233735
g46007.t1	GRAM domain-containing protein 2	gramd2a	-0.869489	0.0496619	-0.917597
g45908.t1	metabotropic glutamate receptor 8-like	grm8	-2.04859	-1.69436	-0.352558
g59667.t1	Glutathione S-transferase	gst	-1.23966	-0.120686	-1.11628
g90450.t1	Glutathione S-transferase theta-4	gstt4	-1.12056	-0.277247	-0.842357
g47190.t1	Nucleolar GTP-binding protein 1	gtpbp4	0.360282	-0.254497	0.616502
g30522.t1	H-2 class II histocompatibility antigen, E-U alpha chain (Fragment)	h-2_e-u	-0.823835	-2.86822	2.04823
g79761.t1	Probable E3 ubiquitin-protein ligase HERC3	herc3	-0.689561	-1.51478	0.832064
g22057.t1	hairy/enhancer-of-split related with YRPW motif protein 2	hey2	1.09802	2.70304	-1.58861
g62372.t1	Protein-cysteine N-palmitoyltransferase HHAT-like protein	hhatl	-3.21831	-2.80106	-0.426598
g30.t1	PROTEIN HIKESHI	hikeshi	1.32712	1.19208	0.145842
g27354.t1	Histone H2B 3	hist2h2l	1.34444	-1.29777	2.64332
g52757.t1	Homeobox protein Hox-C9 (Fragment)	hoxc9	0.567569	-0.342272	0.917015
g95781.t1	3-keto-steroid reductase	hsd17b7	1.12438	1.50701	-0.373144
g63465.t1	heat shock protein 30	hsp30	-1.86913	-1.68278	-0.190724
g98655.t1	Heat shock protein HSP 90-alpha	hsp90a.1	1.17783	1.80613	-0.621025
g85303.t1	Heat shock 70 kDa protein 1 (DQ524995)	hspa1a	-0.0779894	-0.948192	0.868704
g28841.t1	Heat shock 70 kDa protein 4	hspa4	-0.613856	-0.838066	0.224363
g93178.t1	intermediate filament family orphan 2 isoform X1	iffo2	-0.565295	-0.0638919	-0.500098
g66257.t1	Importin subunit alpha-2	impa2	-0.759187	0.193167	-0.948513
g66230.t1	Importin-5	ipo5	0.17731	-0.407283	0.587421
g93909.t1	IQ domain-containing protein K	iqck	1.00295	0.41283	0.595181
g62618.t1	Insulin receptor substrate 1-B	irs1b	0.503793	-0.0620207	0.570248
g97603.t1	integrin beta-like protein 1	itgbl1	-1.2371	-0.960591	-0.274512
g43361.t1	Protein jagunal homolog 1-B	jagn1b	0.611313	0.291394	0.327202
g60378.t1	Voltage-gated potassium channel subunit beta-1	kcnab1	-0.743513	-0.807833	0.0656679
g54027.t1	uncharacterized protein KIAA0408-like	kiaa0408	-0.310787	-0.876743	0.569971
g37397.t1	Uncharacterized protein KIAA1370 homolog	kiaa1370	-0.0821964	-0.767168	0.683475
g29535.t1	Kinesin-like protein KIF16B	kif16b	0.90168	0.575421	0.321509
g62121.t1	kelch-like protein 3 isoform X2	klhl3	-0.929308	1.13062	-2.06235
g9697.t1	Keratin, type II cytoskeletal	krt	-1.70282	-0.926068	-0.774754
g10520.t1	Keratin-associated protein 5-4	krtap5-4	-2.20646	-3.22451	1.02485
g54666.t1	Lethal(3)malignant brain tumor-like protein 1	l3mbtl1	-1.13375	-1.17323	0.0304263
g46833.t1	L antigen family member 3	lage3	0.524766	-0.158046	0.685759
g22337.t1	LYSOSOME-ASSOCIATED MEMBRANE GLYCOPROTEIN 5	lamp5	0.889432	0.702561	0.191781
g2977.t1	Lipocalin	lcn	-2.06634	-0.576516	-1.48458
g84177.t1	lipocalin-like	lcnl1	-1.07056	0.324291	-1.3937
g21492.t1	L-lactate dehydrogenase B chain	ldhb	-0.695384	-0.516894	-0.18085
g34709.t1	mannose-specific lectin-like	lecasal	-0.785991	0.34368	-1.13031
g82899.t1	endothelial lipase-like isoform X2	lipg	-1.14312	-1.18003	0.03957
g82897.t1	endothelial lipase-like isoform X2	lipg	-2.1556	-2.01735	-0.136375
g22720.t1	Protein lunapark-B	lnpk	-0.648282	-0.941005	0.297515
g88506.t1	uncharacterized protein LOC100706016 isoform X1	loc100706016	-0.837945	-0.214551	-0.62202
g61605.t1	uncharacterized protein LOC101062387 [Takifugu rubripes]	loc101062387	0.127637	-0.497848	0.628202
g86476.t1	myosin heavy chain, fast skeletal muscle-like	loc101071797	-2.99659	-3.90868	0.911407
g86478.t1	myosin heavy chain, fast skeletal muscle	loc101071797	-2.8055	-3.96123	1.15446
g47073.t1	myosin heavy chain, fast skeletal muscle	loc101071797	-1.6258	-1.5999	-0.0251702
g84219.t1	uncharacterized protein LOC101170377	loc101170377	0.207157	0.695746	-0.484582
g34581.t1	uncharacterized protein LOC102782386	loc102782386	-3.996	-3.08053	-0.921888
g51532.t1	uncharacterized protein LOC103387928 isoform X2	loc103387928	-1.49298	1.57782	-3.06609
CDS_not_predicted	uncharacterized protein LOC104922920	loc104922920	0.740632	0.52045	0.224319
g55461.t1	DUODENASE-1-LIKE	LOC106584265	0.240599	0.687018	-0.442806
g73719.t1	uncharacterized protein LOC107659388 isoform X1	loc107659388	-0.796159	1.60656	-2.39078
g24828.t1	uncharacterized protein LOC107978944 isoform X2	loc107978944	0.406131	0.881249	-0.471755
g57793.t1	uncharacterized protein LOC108872589 isoform X1	loc108872589	-3.02507	-1.66192	-1.36152
g65022.t1	uncharacterized protein LOC108877178 isoform X3	loc108877178	-0.797365	-0.584007	-0.209608
g15620.t1	uncharacterized protein LOC108890542	loc108890542	-2.56548	-3.18314	0.618696
g43561.t1	uncharacterized protein LOC109202625	loc109202625	1.29044	0.41101	0.874131
g83766.t1	uncharacterized protein LOC110361972 isoform X2	loc110361972	2.01652	1.51278	0.504495
g74316.t1	uncharacterized protein LOC110367412	loc110367412	-1.77825	-1.20265	-0.573634
g69740.t1	Putative methyltransferase-like protein LOC121952	loc121952	0.986797	0.258115	0.722331
g46447.t1	leucine-rich repeat and calponin homology domain-containing protein 3-like	lrch3	0.385411	-3.25693	3.63746
g83980.t1	Leucine-rich repeat-containing protein 67	lrrc67	0.974959	-0.51028	1.4882
g87812.t1	Leucine-rich repeat and transmembrane domain-containing protein 1	lrtm1	0.531317	0.0825971	0.45012
g4723.t1	LYR motif-containing protein 5	lyrm5a	0.472188	1.00952	-0.534483
g73131.t1	LYR motif-containing protein 5A	lyrm5a	0.508832	-0.409259	0.922689
g2752.t1	MAP3K7 C-terminal-like protein	map3k7cl	-0.872036	-0.224203	-0.642481
g60270.t1	Muscleblind-like protein 1	mbnl1	0.30328	-0.716476	1.02583
g44592.t1	Monocyte chemotactic protein 1B (Fragment)	mcp-1b	0.569962	2.26343	-1.69737
g7163.t1	Meteorin-like protein	metrnl	-0.314489	0.867163	-1.17854
g70420.t1	Meteorin-like protein	metrnl	-0.364974	-0.726391	0.367101
g42226.t1	methyltransferase-like protein 22	mettl22	0.730769	0.48568	0.249257
g85541.t1	Major facilitator superfamily domain-containing protein 5	mfsd5	-3.05451	-1.03674	-2.02491
g53555.t1	Myosin regulatory light chain 2B, cardiac muscle isoform	mlrb	-5.56363	-4.47806	-1.10004
g96391.t1	MMS19 nucleotide excision repair protein homolog	mms19	-0.802559	3.52987	-4.31867
g81725.t1	MORONECIDIN	moro	-1.74454	-0.888677	-0.854185
g6486.t1	55 kDa erythrocyte membrane protein	mpp1	-0.514299	-1.87249	1.36646
g24979.t1	Myosin phosphatase Rho-interacting protein	mprip	-2.55128	-1.85768	-0.690151
g16054.t1	28S ribosomal protein S26, mitochondrial	mrps26	0.401402	0.761609	-0.356792
g55908.t1	PUTATIVE PROTEIN MSS51 HOMOLOG, MITOCHONDRIAL	mss51	0.511837	0.163182	0.348251
g16455.t1	Growth/differentiation factor 8 (myostatin)	mstn	0.900096	0.282915	0.614234
g35559.t1	mucin-5AC-like	muc5ac	0.131251	-0.601304	0.736947
g34836.t1	Mitochondrial ubiquitin ligase activator of NFKB 1	mul1	1.38013	1.36424	0.0216834
g83155.t1	Musculoskeletal embryonic nuclear protein 1	mustn1	-0.708902	-0.5191	-0.185617
g14850.t1	Myosin regulatory light chain 2, ventricular/cardiac muscle isoform	myl2	-4.64891	-3.43722	-1.23025
g93635.t1	Myosin light chain kinase family member 4	mylk4	-0.56299	-0.432485	-0.130662
g264.t1	myosin-7	myo7	-5.27268	-3.84376	-1.44484
g78615.t1	Myogenic differentiation factor 1	myod1	-0.606153	-0.465168	-0.137902
g88624.t1	nascent polypeptide-associated complex subunit alpha, muscle-specific form-like isoform X2	naca	0.673076	0.513221	0.162642
g31843.t1	neuroblast differentiation-associated protein AHNAK-like	ndahnakl	-0.869312	-0.371098	-0.49396
g63546.t1	neurofilament light polypeptide	nefl	-1.38345	-0.487064	-0.89632
g76802.t1	nuclear factor 7, brain-like	nf7	-1.14785	-0.775255	-0.366731
g8203.t1	SODIUM/HYDROGEN EXCHANGER 6-LIKE	nhx6	-0.970234	-0.208552	-0.760425
g42835.t1	Neurolysin, mitochondrial	nln	1.51847	0.696425	0.826824
g33761.t1	NACHT, LRR and PYD domains-containing protein 12-like	nlrp12	-1.10814	-1.30533	0.194756
g27151.t1	N-myc-interactor	nmi	-0.79474	-2.19504	1.40503
g92618.t1	nodal homolog 2-A-like	nodal	0.579414	-0.280976	0.862319
g10392.t1	U8 snoRNA-decapping enzyme	nudt16	-0.950166	-0.261412	-0.682764
g59720.t1	Oral cancer-overexpressed protein 1	oraov1	-1.52682	-1.04733	-0.479303
g65748.t1	Oxysterol-binding protein-related protein 5	osbpl5	0.548776	0.275738	0.272716
g37464.t1	spore wall protein 2-like, partial	osw2	-2.41595	-1.34811	-1.07678
g51259.t1	Otoraplin	otor	1.20236	1.60345	-0.398833
g78682.t1	OTU domain-containing protein 1	otud1	-1.00176	-1.67957	0.680349
CDS_not_predicted	OTU domain-containing protein 1 [Lates calcarifer]	otud1	-1.66914	-2.95007	1.28024
g89656.t1	Parkin coregulated gene protein	pacrg	-3.79232	-2.03885	-1.74882
g82749.t1	Post-GPI attachment to proteins factor 2	pgap2	-0.594756	1.30568	-1.89563
g88327.t1	Probable myosin regulatory light chain	piin_06198	-0.227596	0.5703	-0.796949
g43734.t1	type 2 phosphatidylinositol 4,5-bisphosphate 4-phosphatase isoform X1	pip4p2	0.661258	-0.135561	0.802573
g94926.t1	placenta-specific protein 9-like	plac9	-0.597637	-0.344244	-0.248945
g94231.t1	1-phosphatidylinositol-4,5-bisphosphate phosphodiesterase delta-3-A	plcd3	0.442061	-0.22156	0.660887
g81720.t1	pleurocidin-like peptide WF3 isoform X2	ple3	-1.93752	-1.64336	-0.294141
g75676.t1	Patatin-like phospholipase domain-containing protein 2 (JX975711)	pnpla2	-1.42821	-0.682105	-0.754768
g77822.t1	DNA-directed RNA polymerases I, II, and III subunit RPABC1	polr2e	-0.201166	0.476411	-0.677234
g93172.t1	Peroxisome proliferator-activated receptor gamma	pparg	1.75224	-0.531501	-1.97527
nc-RNA	ENSLOCT00000027024,lincRNA	ENSLOCT00000027024	-1.35365	0.226885	-0.832485
g20217.t1	Peptidyl-prolyl cis-trans isomerase	ppia	-2.74698	-1.54614	-1.20324
g96468.t1	protein phosphatase 1 regulatory subunit 12A	ppp1r12a	-1.209	-0.871285	-0.336054
g59595.t1	PROTEIN PHOSPHATASE 1 REGULATORY SUBUNIT 27-LIKE	ppp1r27	0.5173	-0.322104	0.840087
g76025.t1	receptor-type tyrosine-protein phosphatase C-like isoform X2	ptprc	0.0901248	-0.82062	0.917407
g80808.t1	PERLWAPIN-LIKE ISOFORM X1	pwap	-0.932883	-0.49954	-0.427867
g88850.t1	Rab11 family-interacting protein 1	rab11fip1	-0.100035	1.3977	-1.49058
g44262.t1	Arginyl-tRNA synthetase, cytoplasmic	rars	-0.523862	-0.417771	-0.103281
g78058.t1	Dexamethasone-induced Ras-related protein 1	rasd1	1.59063	-0.393361	1.99264
g86308.t1	Retinoid-binding protein 7	rbp7	-2.95768	-0.897012	-2.06492
g18885.t1	REST corepressor 1	rcor1	0.140483	-0.93696	1.07433
g3129.t1	retinol dehydrogenase 8-like	rdh8	-0.971941	-1.31505	0.345755
g70363.t1	Regulator of G-protein signaling 1	rgs1	1.55436	1.55901	-0.00217349
g67158.t1	GTP-binding protein Rheb	rheb	0.748454	0.28734	0.466663
g15761.t1	E3 ubiquitin-protein ligase RNF144B	rnf144b	0.65558	0.0629252	0.590806
g82828.t1	retinitis pigmentosa 1-like 1 protein	rp1l1	-1.01615	-0.51208	-0.498849
g87661.t1	RNA polymerase II-associated protein 3	rpap3	-0.623433	-0.776044	0.157274
g87905.t1	60S ribosomal protein L32	rpl32	0.0630854	-0.498409	0.566822
g48034.t1	60S ribosomal protein L35	rpl35a	-0.338686	-0.60796	0.27159
g63751.t1	ribonuclease P protein subunit p25-like protein	rpp25l	0.788133	0.511066	0.279842
g96288.t1	Ribosomal L1 domain-containing protein 1	rsl1d1	0.69923	0.555052	0.14282
g10939.t1	Ryanodine receptor 1	ryr1	0.457318	-0.172818	0.636946
g57464.t1	Atherin	samd1	0.927353	1.40826	-0.480619
g41409.t1	deoxynucleoside triphosphate triphosphohydrolase SAMHD1-like isoform X3	samhd1	-3.22364	-3.09923	-0.121016
g75749.t1	Acyl-CoA desaturase (SCD1a) (JQ277703)	scd1a	-1.63764	-0.771731	-0.863759
g85538.t1	Sentrin-specific protease 1	senp1	1.33138	2.37769	-1.04133
g3135.t1	Sentrin-specific protease 6	senp6	0.747148	0.566742	0.185705
g76194.t1	Selenoprotein Pa	sepp1a	-0.10129	-0.855451	0.75814
g63072.t1	N-lysine methyltransferase setd6	setd6	0.516073	0.106502	0.412133
g80232.t1	Serine/threonine-protein kinase Sgk1-A	sgk1a	-0.78774	-0.479355	-0.300772
g83909.t1	protein shisa-2 homolog	shisa2	1.06523	0.26742	0.802576
g87193.t1	Sucrase-isomaltase, intestinal	si	-0.921065	-0.995431	0.0745291
g94687.t1	homeobox protein SIX2	six2	0.414486	-0.177346	0.597839
g1921.t1	Src kinase-associated phosphoprotein 2	skap2	-0.849464	-0.641919	-0.205391
g71031.t1	Monocarboxylate transporter 6	slc16a5	-0.72848	-1.19676	0.466968
g83344.t1	Solute carrier family 25 member 34	slc25a34	0.560892	0.459786	0.10412
g79312.t1	Probable UDP-sugar transporter protein SLC35A4	slc35a4	-0.430502	-1.32291	0.900282
g34258.t1	4F2 cell-surface antigen heavy chain	slc3a2	0.800475	-0.170582	0.965824
g68087.t1	Solute carrier family 41 member 2	slc41a2	0.90889	0.241308	0.675424
g52736.t1	Choline transporter-like protein 1	slc44a1	1.21992	0.651714	0.565774
g81635.t1	Sodium/iodide cotransporter	slc5a5	0.965175	0.45296	0.51807
g49667.t1	SWI/SNF-related matrix-associated actin-dependent regulator of chromatin subfamily A-like protein 1	smarcal1	0.341649	1.19129	-0.848588
g77492.t1	Single-strand selective monofunctional uracil DNA glycosylase	smug1	2.02116	-0.05768	2.08052
g35282.t1	N-lysine methyltransferase SMYD2-A	smyd2a	-0.0995234	-0.63992	0.542203
g85645.t1	Gamma-synuclein	sncg	-1.07925	0.415179	-1.4966
g65078.t1	Vacuolar-sorting protein SNF8	snf8	-0.544919	-0.733619	0.19045
g26563.t1	U5 small nuclear ribonucleoprotein 40 kDa protein	snrnp40	1.15984	0.779508	0.383433
g90255.t1	Sperm acrosome membrane-associated protein 4	spaca4	-1.32398	-0.635765	-0.683943
g23634.t1	Sperm-associated antigen 17	spag17	2.17363	0.815365	1.36413
g2962.t1	serine/arginine repetitive matrix protein 2-like isoform X1	srrm2	-0.695411	-0.85654	0.164471
g87255.t1	Translocon-associated protein subunit gamma	ssr3	0.588515	0.226045	0.365102
g93402.t1	Afadin- and alpha-actinin-binding protein	ssx2ip	-0.311359	-0.8122	0.502798
g94361.t1	Serine/threonine-protein kinase 17A	stk17a	-1.33625	-1.72651	0.397376
g67044.t1	Spermatid perinuclear RNA-binding protein	strbp	0.953943	0.439454	0.520055
g30434.t1	Striatin-3	strn3	-0.803903	-0.872352	0.0669348
g9969.t1	Syntaxin-binding protein 3	stxbp3	-0.584382	-0.915607	0.331909
g95377.t1	supervillin isoform X9	svil	0.639718	-0.908714	1.53528
g45195.t1	supervillin isoform X17	svil	-0.697951	-0.787929	0.0814861
g99002.t1	Supervillin	svil	-0.874537	-0.291239	-0.584564
g64330.t1	Tyrosine-protein kinase SYK	syk	-1.85402	-0.727875	-1.12878
g11164.t1	Synaptojanin-2-binding protein	synj2bp	-0.551689	0.523678	-1.07149
g56124.t1	translational activator of cytochrome c oxidase 1	taco1	-0.317545	-0.712384	0.401111
g60010.t1	TBC1 domain family member 19	tbc1d19	0.683573	0.231792	0.454236
g24306.t1	T-box transcription factor TBX5 isoform X1	tbx5	-0.0767912	1.05146	-1.11733
g43330.t1	T-complex protein 11-like protein 2	tcp11l2	-0.578127	-0.601876	0.0271883
g76514.t1	TESTIS DEVELOPMENT-RELATED PROTEIN	tdrp	-2.6963	-0.722549	-1.99023
g13896.t1	TETRASPANIN-8-LIKE	tet8	0.516168	0.422983	0.0941601
g84825.t1	Thrombospondin-2	thbs2	0.369122	-0.363867	0.734049
g51533.t1	THO COMPLEX SUBUNIT 6 HOMOLOG	thoc6	0.61251	0.319479	0.294566
g16919.t1	Tumor necrosis factor alpha-induced protein 2	tnfaip2	-0.649019	-0.525224	-0.124812
g77007.t1	Troponin I, cardiac muscle	tnni3	-4.34547	-4.1641	-0.181348
g50921.t1	Mitochondrial import receptor subunit TOM5 homolog (JX975238)	tomm5	-0.272403	0.380743	-0.650555
g90369.t1	TORSIN-4A-B-LIKE	tor4a	-0.922967	0.88725	-1.80541
g24214.t1	Tumor suppressor p53-binding protein 1	tp53bp1	1.03269	1.1754	-0.139994
g55635.t1	Probable thiopurine S-methyltransferase	tpmt	0.785889	1.25596	-0.46532
g92212.t1	Metalloprotease TIKI2	trabd2b	0.89466	0.27057	0.628697
g27181.t1	tripartite motif-containing protein 55-like isoform X4	trim55	0.229362	-0.631704	0.866347
g20833.t1	TRNA (ADENINE(58)-N(1))-METHYLTRANSFERASE, MITOCHONDRIAL	trmt61b	0.699528	0.517981	0.18358
g31582.t1	TSC22 domain family protein 1 isoform X1	tsc22d1	-0.357453	-0.630684	0.280879
g32328.t1	Translin	tsm	1.37369	0.768506	0.606694
g51622.t1	tetraspanin-12 isoform X1	tspan12	0.805531	0.535256	0.275121
g26358.t1	UBA-like domain-containing protein 1	ubald1	1.40078	0.274188	1.11649
g98930.t1	Ubiquitin-associated protein 2	ubap2	0.111906	-0.891951	1.00382
g11581.t1	Polyubiquitin-B	ubb	0.663567	0.680144	-0.0132741
g34775.t1	Ubiquitin-like protein 5	ubl5	-0.243777	0.671901	-0.911496
g54990.t1	E3 ubiquitin-protein ligase UBR4	ubr4	-0.62475	-0.832372	0.211579
g73074.t1	Unique cartilage matrix-associated protein	ucma	-0.205316	0.569628	-0.771484
g64691.t1	Mitochondrial uncoupling protein 3 (UCP3) (EU555336)	ucp3	-0.85763	-1.44305	0.582922
g82999.t1	Ubiquitin fusion degradation protein 1 homolog	ufd1	-0.54872	-0.896365	0.353764
g69489.t1	Ufm1-specific protease 1	ufsp1	-0.220604	-1.60916	1.39365
g10311.t1	UPF0598 protein C8orf82 homolog	upf0598	-0.859733	-0.229367	-0.627778
g10910.t1	Ubiquitin carboxyl-terminal hydrolase 28	usp28	0.119754	-0.752232	0.868131
g37927.t1	U3 SMALL NUCLEOLAR RNA-ASSOCIATED PROTEIN 4 HOMOLOG	utp4	0.919184	0.267186	0.656536
g7422.t1	Voltage-dependent anion-selective channel protein 2	vdac2	0.0595589	0.872615	-0.812558
g78936.t1	Voltage-dependent anion-selective channel protein 2	vdac2	-0.479994	-0.133381	-0.34395
g31571.t1	Vacuolar protein sorting-associated protein 37B	vps37b	0.117398	-0.522255	0.64236
g47608.t1	vacuolar protein sorting-associated protein 53 homolog	vps53	-0.805251	-0.824714	0.0253762
g15180.t1	Vacuolar protein sorting-associated protein VTA1 homolog	vta1	-0.316334	-1.07045	0.759771
g21415.t1	VON WILLEBRAND FACTOR A DOMAIN-CONTAINING PROTEIN 7-LIKE	vwa7	0.17305	-0.752863	0.925448
g96571.t1	WAP, kazal, immunoglobulin, kunitz and NTR domain-containing protein 2	wfikkn2	-0.48858	-0.852704	0.366632
g77869.t1	YjeF N-terminal domain-containing protein 3	yjefn3	0.584885	-1.51677	2.10008
g71837.t1	Zinc-binding alcohol dehydrogenase domain-containing protein 2	zadh2	0.675327	0.68207	-0.00187676
g8652.t1	zinc finger BED domain-containing protein 1-like	zbed1	0.443382	-1.36209	1.80959
g25701.t1	Zinc finger CCCH domain-containing protein 15	zc3h15	0.627707	-0.01267	0.644919
g71171.t1	AN1-type zinc finger protein 1	zfand1	0.776216	0.0393748	0.738174
g9005.t1	Zinc finger protein 106 homolog	zfp106	-0.00479197	-0.762929	0.752837
g74832.t1	Zinc finger protein 384	znf384	0.446464	-0.191898	0.6448
g53276.t1	Zinc finger protein 648	znf648	1.49457	1.23748	0.267178
g56104.t1	zinc finger protein 665-like	znf665l	-0.732535	-1.28656	0.55884

## Sheet: TS4 C
Supplementary Table 4c. Differentially expressed genes and associated enriched pathways. 1: Positive regulation of locomotion, 2: Ribonucleoprotein complex biogenesis, 3: Protein folding, 4: Response to abiotic stimulus, 5: Protein modification by small protein conjugation or removal.
Genome Name	Best Description	Gene symbol	M-Hyp/N log2FC	Enriched pathway
g7170.t1	10 kDa heat shock protein, mitochondrial (JX975224)	hspe1	1.41139	3,4,5
g11694.t1	26S proteasome non-ATPase regulatory subunit 11	psmd11	-0.693637	5
g72550.t1	26S proteasome non-ATPase regulatory subunit 12 (KM522790)	psmd12	-0.615055	5
g34870.t1	60S ribosomal protein L14	rpl14	7.46914	2.4
g19087.t1	60S ribosomal protein L27	rpl27	-1.19304	2.4
g87626.t1	78 kDa glucose-regulated protein	hspa5	0.882026	1.4
g45913.t1	Activator of basal transcription 1	abt1	0.628145	2.4
g1859.t1	Allograft inflammatory factor 1	aif1	-2.46854	1
g74249.t1	Ankyrin repeat domain-containing protein 1	ankrd1	0.625401	4.5
g78361.t1	Apoptosis-enhancing nuclease	aen	1.00206	4.5
g84762.t1	BAG family molecular chaperone regulator 2	bag2	0.730881	3,4,5
g83289.t1	Bystin	bysl	0.734199	2.4
g53103.t1	Calreticulin (KF857313)	calr	0.591256	1
g7714.t1	C-C motif chemokine 19-like isoform X2	ccl19	1.23393	1.4
g82629.t1	Cell cycle checkpoint control protein RAD9A	rad9a	1.11571	4.5
g88166.t1	Cell growth-regulating nucleolar protein	lyar	0.831488	2.4
g95868.t1	C-X-C chemokine receptor type 4 (Fragment)	cxcr4	-1.15266	1
g42233.t1	Disintegrin and metalloproteinase domain-containing protein 17	adam17	-0.631682	1,4
g17267.t1	DYSFERLIN-LIKE	dysf	-1.06554	1.4
g62614.t1	E3 ubiquitin-protein ligase RNF152-like	rnf152	0.803582	5
g6845.t1	F-box only protein 40-like	fbxo40	0.877529	5
g77287.t1	Guanine nucleotide-binding protein-like 3	gnl3	0.75882	2.4
g43675.t1	H/ACA ribonucleoprotein complex subunit 3	nop10	0.971988	2.4
g51733.t1	Hypoxia-inducible factor 1-alpha inhibitor	hif1an	0.79938	4.5
g67792.t1	Laminin subunit beta-1 (Fragment)	lamb1	1.66926	1
g48878.t1	Mediator of RNA polymerase II transcription subunit 21	med21	1.20411	5
g55058.t1	Nuclear migration protein nudC	nudc	0.805799	3,4,5
g86035.t1	Nucleoporin NUP188 homolog	nup188	0.698619	4.5
g78682.t1	OTU domain-containing protein 1	otud1	2.05536	5
g78683.t1	OTU domain-containing protein 1 [Lates calcarifer]	otud1	2.06746	5
g84455.t1	Peptidyl-prolyl cis-trans isomerase FKBP4	fkbp4	1.12525	3,4,5
g84191.t1	POLYCOMB COMPLEX PROTEIN BMI-1-A-LIKE	bmi1	-0.777832	5
g50908.t1	Pre-mRNA-processing factor 19	prpf19	1.40927	2,4,5
g70235.t1	Probable dimethyladenosine transferase	dimt1	0.833939	2.4
g27265.t1	PROBABLE E3 UBIQUITIN-PROTEIN LIGASE DTX2 ISOFORM X1	dtx2	-1.03117	5
g31838.t1	Probable E3 ubiquitin-protein ligase MYCBP2	mycbp2	-1.36131	5
g85390.t1	prostaglandin E synthase 3	ptges3	0.792133	3,4,5
g10454.t1	Proteasome subunit alpha type-6	psma6	-0.6912	5
g63354.t1	protocadherin-15-like	pcdh15	0.89052	4.5
g92948.t1	Putative rRNA methyltransferase 3	ftsj3	1.03509	2.4
g12929.t1	Ras GTPase-activating protein-binding protein 1	g3bp1	1.1979	2.4
g2328.t1	Rho guanine nucleotide exchange factor 2	arhgef2	-1.62844	1
g4573.t1	ribosomal RNA processing protein 1 homolog B-like	rrp1b	1.47613	2.4
g47984.t1	Ribosomal RNA processing protein 36 homolog	rrp36	0.683442	2.4
g43254.t1	Ribosome biogenesis protein BRX1 homolog	brix1	1.04685	2.4
g28989.t1	RNA-binding protein 4	rbm4	1.39998	2.4
g83156.t1	RuvB-like 1	ruvbl1	1.05003	5
g2942.t1	Ryanodine receptor 1	ryr1	0.972728	4.5
g23442.t1	Serine/threonine-protein kinase mTOR	mtor	-0.691861	1.4
g93852.t1	Serine/threonine-protein kinase PLK2	plk2	1.38195	1
g98188.t1	small glutamine-rich tetratricopeptide repeat-containing protein alpha	sgta	0.716668	5
g45324.t1	transforming growth factor beta-2	tgfb2	-5.04941	1
g26871.t1	transmembrane channel-like protein 1	tmc1	1.28658	4.5
g93454.t1	Ubiquitin carboxyl-terminal hydrolase 14	usp14	0.817873	5
g78695.t1	Ubiquitin-like modifier-activating enzyme 5	uba5	0.889275	5
g42698.t1	UV excision repair protein RAD23 homolog A-like isoform X1	rad23a	0.573248	5
g50986.t1	Probable alpha-ketoglutarate-dependent dioxygenase ABH7	abh7	0.789492
g76446.t1	Long-chain-fatty-acid--CoA ligase ACSBG2	acsbg2	0.638957
g30888.t1	Activator of 90 kDa heat shock protein ATPase homolog 1	ahsa1	0.856941
g36928.t1	AP-3 complex subunit sigma-2	ap3s2	0.967888
g78245.t1	AP-4 complex subunit beta-1 isoform X2	ap4b1	-3.27347
g91918.t1	Probable methylthioribulose-1-phosphate dehydratase	apip	0.759725
g28361.t1	Rho GTPase-activating protein 12	arhgap12	-0.648339
g93888.t1	Activating signal cointegrator 1 complex subunit 3	ascc3	1.05617
g87615.t1	Argininosuccinate synthase	ass	0.832249
g41732.t1	autophagy-related protein 16-2-like isoform X1	atg16l2	0.709908
g2439.t1	ATP synthase subunit g, mitochondrial (KC217611)	atp5l	-0.889535
g73330.t1	UDP-GalNAc:beta-1,3-N-acetylgalactosaminyltransferase 2	b3galnt2	-0.851245
g22136.t1	Betaine--homocysteine S-methyltransferase 1	bhmt	3.19222
g33730.t1	putative butyrophilin subfamily 2 member A3	btn2a3p	1.15169
g88914.t1	Uncharacterized protein C9orf85 homolog	c9orf85	1.08493
g57753.t1	Carbohydrate sulfotransferase 14	chst14	-1.9596
g89538.t1	Collagen alpha-1(X) chain	col10a1	-1.55165
g96455.t1	Cytochrome c oxidase assembly protein COX19	cox19	-1.08232
g83238.t1	Exportin-2	cse1l	0.695342
g38899.t1	Cleavage stimulation factor subunit 1	cstf1	0.852197
g25874.t1	Cleavage stimulation factor subunit 2 tau variant	cstf2t	0.817944
g52736.t1	Choline transporter-like protein 1	ctl1	-1.15053
g62602.t1	Cytohesin-3	cyth3	1.59764
g88299.t1	Cytokine-like protein 1	cytl1	-0.746227
g65808.t1	Dolichyl-diphosphooligosaccharide--protein glycosyltransferase 48 kDa subunit	ddost	0.74089
g87562.t1	ATP-dependent RNA helicase DDX54	ddx54	0.621219
g31055.t1	Dehydrogenase/reductase SDR family member 13	dhrs13	-1.01176
g78679.t1	disks large-associated protein 1 isoform X1	dlgap1	0.616238
g24647.t1	Dynein heavy chain 5, axonemal	dnah5	-2.38283
g14672.t1	2'-deoxynucleoside 5'-phosphate N-hydrolase 1	dnph1	-1.26768
g64458.t1	diphthine methyl ester synthase-like	dph5	1.23747
g65757.t1	Dual specificity protein phosphatase 8	dusp8	0.698238
g62844.t1	Receptor-binding cancer antigen expressed on SiSo cells	ebag9	0.612914
g82080.t1	Eukaryotic translation initiation factor 4E type 2	eif4e2	0.718535
g42133.t1	Ecto-NOX disulfide-thiol exchanger 2	enox2	-1.17239
nc-RNA	ENSGACT00000029182,snoRNA	ensgact00000029182	-1.00864
nc-RNA	PUTATIVE_small_RNA, ENSONIT00000026925,SNORD49,snoRNA, ENSTRUT00000048502,SNORD65,snoRNA, ENSAMXT00000027553,SNORD65,snoRNA, ENSGACT00000029168,snoRNA, ENSONIT00000027245,SNORD49,snoRNA	ensonit00000026925	-1.10695
nc-RNA	PUTATIVE_small_RNA, ENSPFOT00000021235,SNORD47,snoRNA, ENSORLT00000026329,snosnR60_Z15,snoRNA, ENSONIT00000026852,snosnR60_Z15,snoRNA, ENSTRUT00000048250,SNORD77,snoRNA, ENSGACT00000028507,snoRNA	enspfot00000021235	-0.80297
g66778.t1	2-epi-5-epi-valiolone synthase-like [Maylandia zebra]	evs	-1.28396
g47603.t1	Protein FAM101B	fam10b	-1.07012
g30447.t1	Protein FAM136A	fam136a	0.955293
g75305.t1	protein FAM173B-like	fam173b	0.972146
g66786.t1	Forkhead box protein P1-B	foxp1b	-2.29912
g52677.t1	serine/threonine-protein kinase fray2-like	fray2	3.04603
g66772.t1	FERM domain-containing protein 4B	frmd4b	0.759929
g28980.t1	Fragile X mental retardation syndrome-related protein 2	fxr2	0.757216
g91382.t1	Glucose-6-phosphate translocase	g6pt	0.888289
g41697.t1	Polypeptide N-acetylgalactosaminyltransferase 14	galnt14	-0.922737
g26229.t1	trifunctional purine biosynthetic protein adenosine-3	gart	-0.839694
g36969.t1	G patch domain-containing protein 4	gpatch4	0.869726
g39989.t1	Glypican-1	gpc1	0.633638
g8335.t1	H-2 class I histocompatibility antigen, Q10 alpha chain-like	h2-q10	-3.18359
g95551.t1	Transcription factor HES-1-B (KF857344)	hes1b	0.871177
g23659.t1	histone H1-like, partial	histone_h1	-1.36388
g53162.t1	Putative hexokinase HKDC1	hkdc1	0.655271
g32395.t1	Heat shock protein HSP 90-alpha	hsp90a.1	2.06508
g4051.t1	Heat shock 70 kDa protein 4	hspa4	0.946002
g95076.t1	DNA-binding protein Ikaros	ikzf1	2.35919
g58524.t1	Importin-4	ipo4	0.949964
g15758.t1	Xylose isomerase	ipr001998	-0.640022
g65215.t1	Lamin-B1	lmnb1	1.27852
g6023.t1	uncharacterized protein LOC100007824	loc100007824	1.02749
g37723.t1	myosin heavy chain, fast skeletal muscle-like, partial	loc101071797	0.618346
g82188.t1	uncharacterized protein LOC101167622 [Oryzias latipes]	loc101167622	-1.17209
g45045.t1	uncharacterized protein LOC105926215	loc105926215	1.028
g22308.t1	uncharacterized protein LOC106605369 isoform X1	loc106605369	-3.97115
g73719.t1	uncharacterized protein LOC107659388 isoform X1	loc107659388	1.71593
g25362.t1	uncharacterized protein LOC109062443	loc109062443	-1.35801
g38418.t1	uncharacterized protein LOC109068229	loc109068229	1.24895
g99667.t1	uncharacterized protein LOC109138306	loc109138306	1.4345
g52049.t1	uncharacterized protein LOC109632014	loc109632014	-2.30954
g29402.t1	uncharacterized protein LOC110014506	loc110014506	-2.4089
g73131.t1	LYR motif-containing protein 5A	lyrm5a	-0.797811
g5540.t1	Protein MAK16 homolog	mak16	0.777248
g92453.t1	Amine oxidase [flavin-containing]	mao	-3.01466
g33019.t1	MAGUK p55 subfamily member 5-A	mpp5a	-1.17021
g35625.t1	39S ribosomal protein L21, mitochondrial	mrpl21	-0.985464
g14850.t1	Myosin regulatory light chain 2, ventricular/cardiac muscle isoform	myl2	-1.34743
g40702.t1	N-acetyltransferase 9	nat9	1.30641
g34359.t1	Neutral cholesterol ester hydrolase 1	nceh1	-0.952388
g95547.t1	nucleolin	ncl	0.922966
g11058.t1	Nucleophosmin	nd2	0.624061
g76802.t1	nuclear factor 7, brain-like	nf7	-1.00783
g85298.t1	Nuclear transcription factor Y subunit alpha	nfya	0.638723
g31268.t1	Nidogen-2	nid2	-1.31802
g30934.t1	Obscurin	obscn	-2.16702
g5689.t1	Serine/threonine-protein kinase PAK 7	pak7	-1.5689
g48067.t1	Poly [ADP-ribose] polymerase 15	parp15	1.54097
g83218.t1	Poly [ADP-ribose] polymerase 3	parp3	0.773874
g86379.t1	Protein polybromo-1	pbrm1	0.767093
g46909.t1	proprotein convertase subtilisin/kexin type 9	pcsk9	-0.854039
g96241.t1	pyridoxal phosphate phosphatase	pdxp	0.572025
g3383.t1	Phosphorylase b kinase regulatory subunit alpha, liver isoform	phka2	1.86931
g50.t1	Pleckstrin homology-like domain family A member 1	phlda1	-1.27741
g18860.t1	26S proteasome non-ATPase regulatory subunit 13	pmsd13	0.651044
g51853.t1	popeye domain-containing protein 2 isoform X1	popdc2	0.729049
g95059.t1	Thioredoxin-dependent peroxide reductase, mitochondrial (peroxiredoxin 3) (GQ252681)	prdx3	-0.566786
g89331.t1	Prolyl endopeptidase	prep	0.807462
Putative_small_RNA	PUTATIVE_small_RNA	putativerna6	-0.910777
g56867.t1	Glutamyl-tRNA(Gln) amidotransferase subunit A, mitochondrial	qrsl1	0.914954
g3129.t1	retinol dehydrogenase 8-like	rdh8	-1.14209
g532.t1	ribonuclease inhibitor	rnh1	1.41206
g86940.t1	60S ACIDIC RIBOSOMAL PROTEIN P2-LIKE	rplp2	-0.735725
g14103.t1	Dolichyl-diphosphooligosaccharide--protein glycosyltransferase subunit 2	rpn2	0.70346
g57464.t1	Atherin	samd1	-0.936254
g4200.t1	serine/threonine-protein kinase SBK2-like, partial	sbk2	1.00188
g51653.t1	Protein SCO2 homolog, mitochondrial	sco2	2.16705
g75695.t1	glutamic acid-rich protein-like	sh3bgrl3	-2.64172
g37247.t1	SH3 domain-containing YSC84-like protein 1	sh3yl1	-1.12802
g187.t1	MITOCHONDRIAL SODIUM/HYDROGEN EXCHANGER 9B2-LIKE	slc9b2	-0.768385
CDS_not_predicted	small integral membrane protein 11A-like	smim11a	0.909402
g32438.t1	gamma-synuclein isoform X1	sncg	-0.81463
g19349.t1	protein spinster homolog 1 isoform X3	spns1	-1.92206
g80839.t1	Spermidine synthase	srm	1.01167
g73816.t1	afadin- and alpha-actinin-binding protein-like	ssx2ip	1.31001
g6145.t1	Stress-induced-phosphoprotein 1	stip1	0.924513
g95611.t1	Suppressor of G2 allele of SKP1 homolog	sugt1	0.790074
g74033.t1	Tubulin-folding cofactor B	tbcb	0.946826
g51622.t1	tetraspanin-12 isoform X1	tspan12	0.744371
g26393.t1	Thioredoxin domain-containing protein 15	txndc15	1.24971
g69489.t1	Ufm1-specific protease 1	ufsp1	-1.19918
g21492.t1	L-lactate dehydrogenase B chain	ldhb	0.64201
g87282.t1	Vacuole membrane protein 1	vmp1	0.742644
g94366.t1	Coenzyme Q-binding protein COQ10 homolog, mitochondrial	zgc:73324	-1.3826
